# Supplementary material for: Structure, photoluminescence, and magnetic properties of a Mn(ii)-based metal–organic framework
Source: Royal Society of Chemistry journal article supplement (doi:10.1039/d0nj04193a), 2020-01-01
Supplement: d0nj04193a1.pdf [file d0nj04193a1.pdf]

## Supporting Information

### **Structure, photoluminescence, and magnetic properties of a Mn(II)-based metal-organic framework**

Hyojin Kim,<sup>†a</sup> Sunhwi Eom,<sup>†a</sup> Sora Park,<sup>†a</sup> Dong Won Kang,<sup>a</sup> Mengmeng Wang,<sup>b</sup>  
Youngseo Kim,<sup>a</sup> Sungnam Park,<sup>a</sup> Wei Shi,<sup>\*b</sup> and Chang Seop Hong<sup>\*a</sup>

<sup>a</sup>*Department of Chemistry, Korea University, Seoul 02841, Republic of Korea.*

<sup>b</sup>*Department of Chemistry, Nankai University, 94 Weijin Road, Tianjin 300071, P. R. China.*

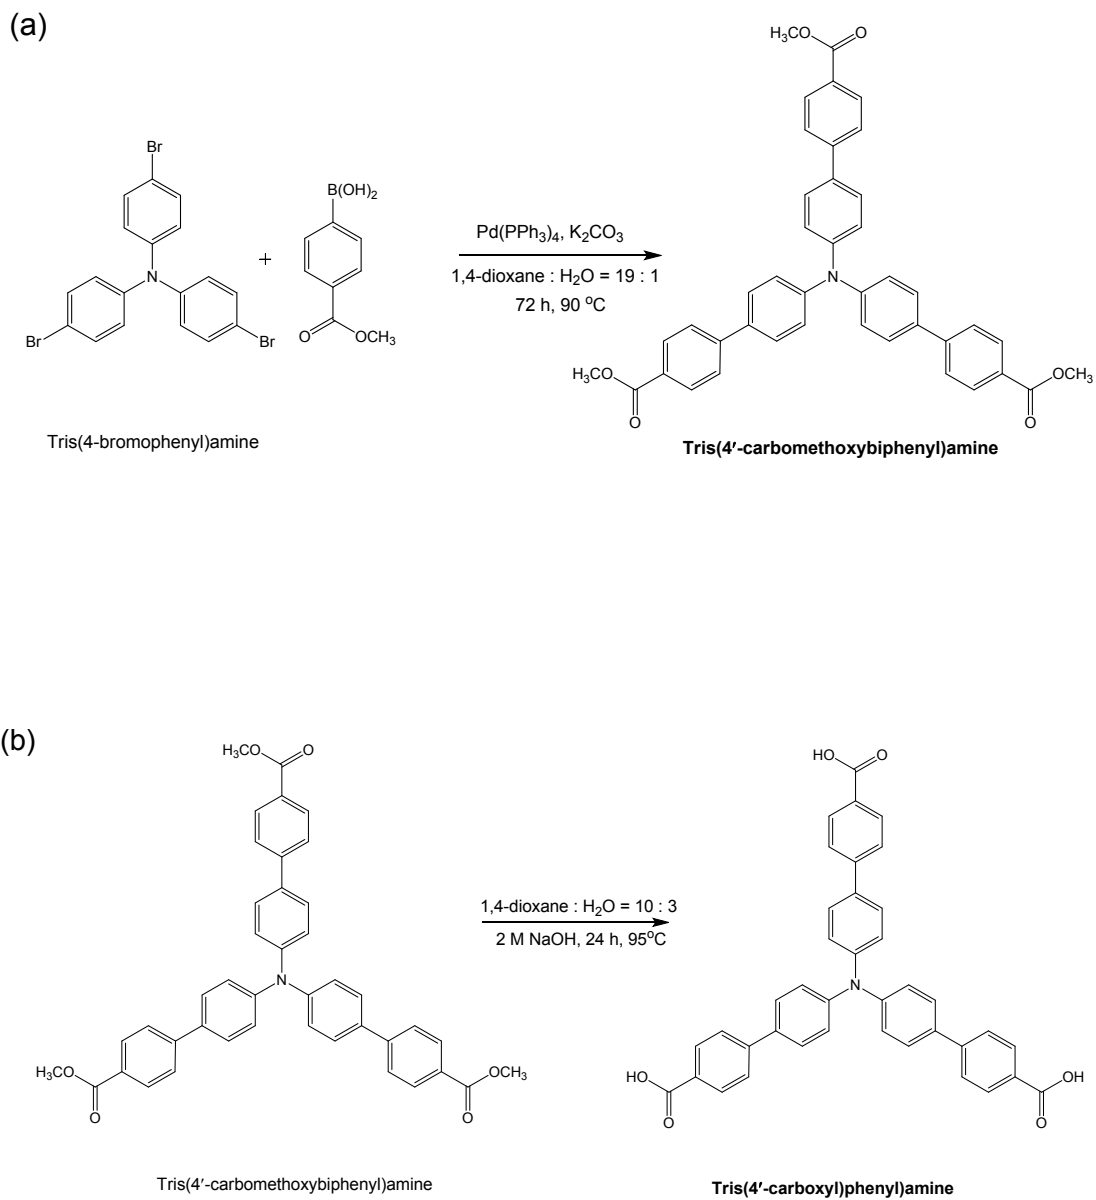

**Scheme S1.** Schematic illustrations for synthesis of (a) tris(4'-carbomethoxybiphenyl)amine and (b) tris((4'-carboxyl)phenyl)amine ( $\text{H}_3\text{L}$ ).

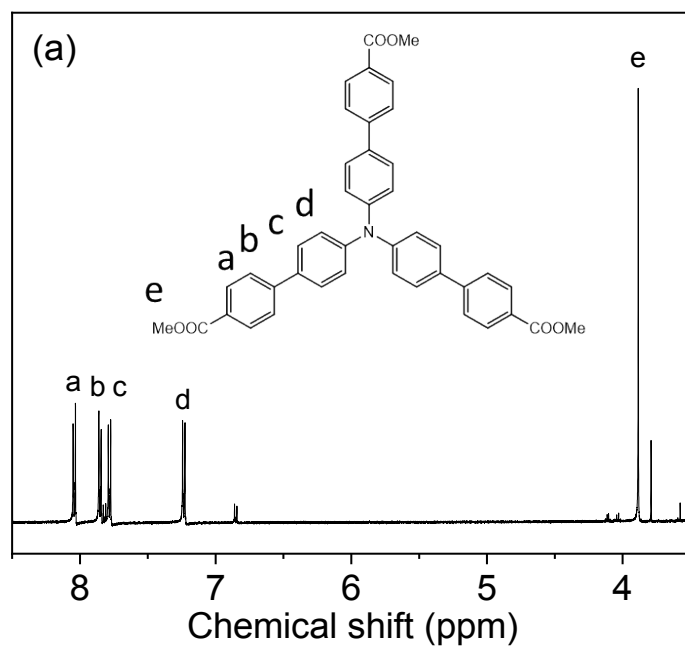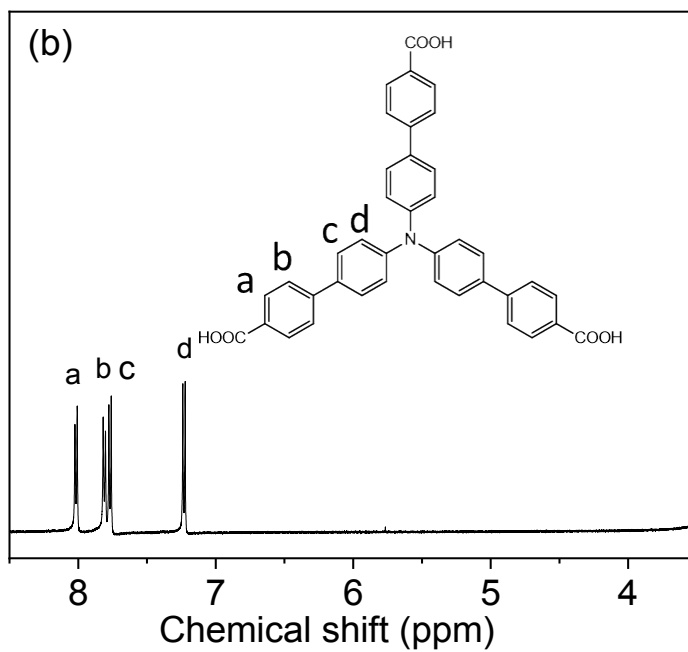

**Fig. S1.** <sup>1</sup>H NMR of (a) tris(4'-carboxymethoxybiphenyl)amine and (b) tris((4-carboxyl)phenyl)amine (H<sub>3</sub>L) (NMR solvent: DMSO).

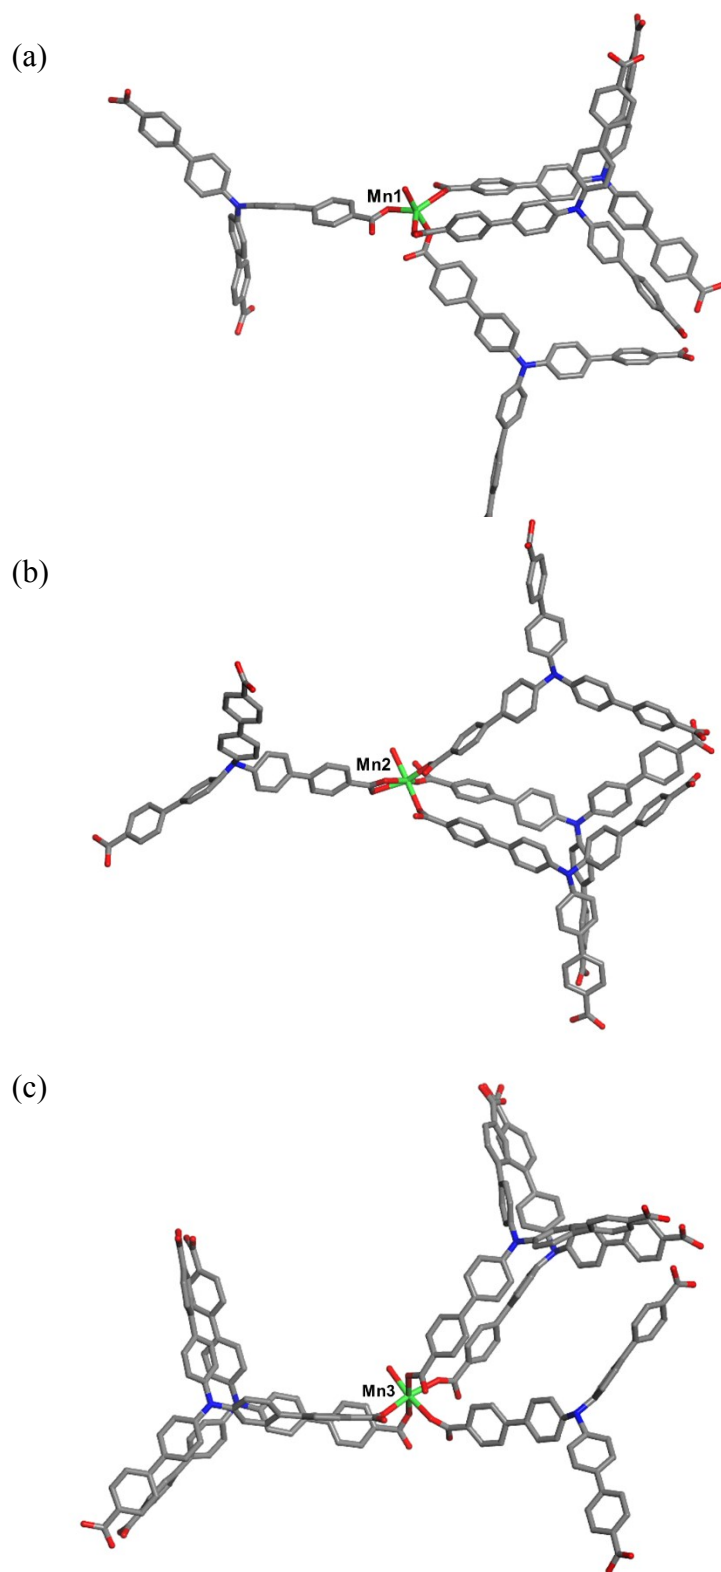

**Fig. S2.** Coordination structures of (a) Mn1 (trigonal bipyramidal), (b) Mn2 (distorted octahedral), and (c) Mn3 (distorted octahedral).

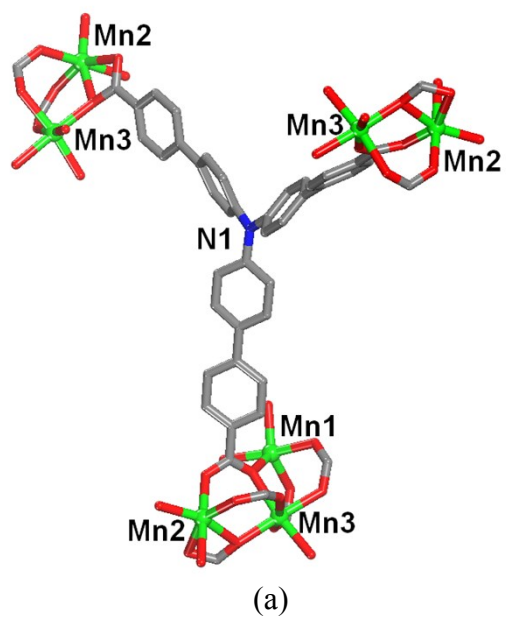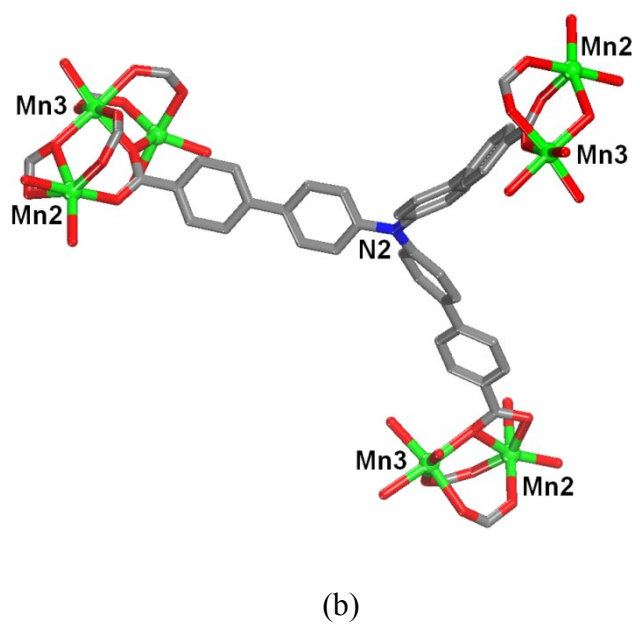

**Fig. S3.** Binding modes of Mn ions by the  $L^{3-}$  ligand.

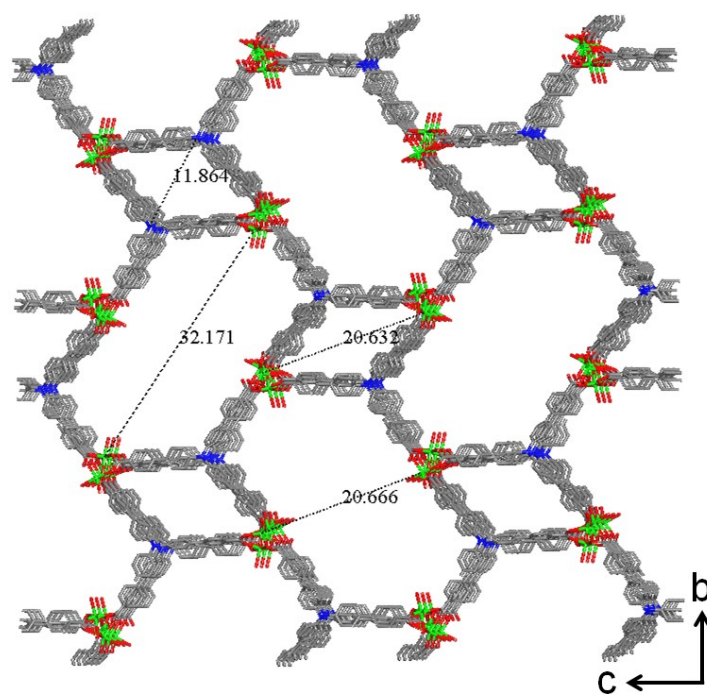

(a)

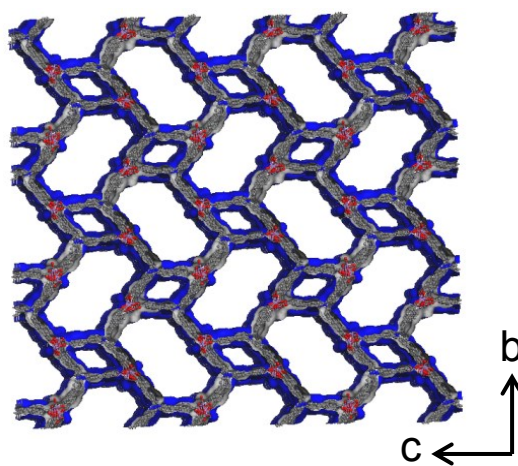

(b)

**Fig. S4.** (a) Extended structure of **1** in the *bc* plane showing 4- and 6-membered rings. The channel sizes of the 4- and 6-membered rings correspond to  $11.9 \times 20.6 \text{ \AA}^2$  and  $20.7 \times 32.2 \text{ \AA}^2$ . (b) Connolly surface of **1** with a probe radius of  $1 \text{ \AA}$ .

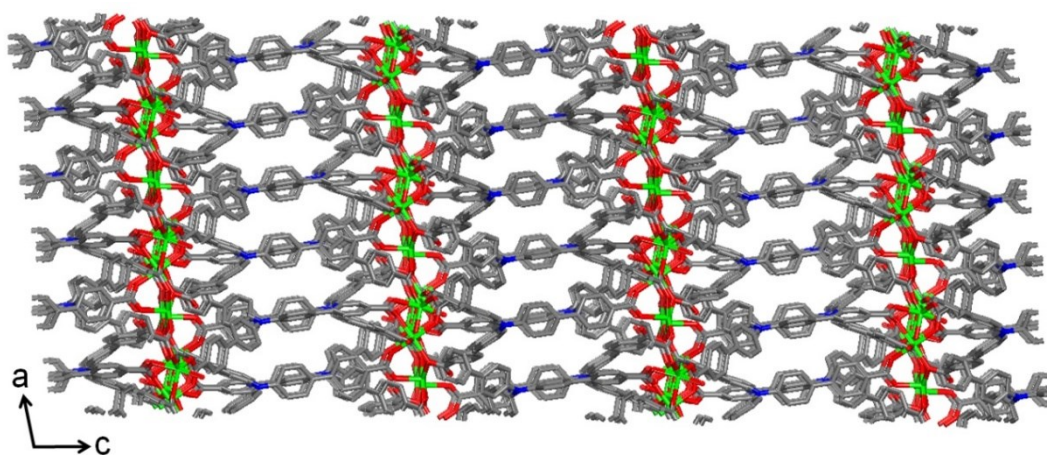

**Fig. S5.** Extended structure of **1** in the ac plane.

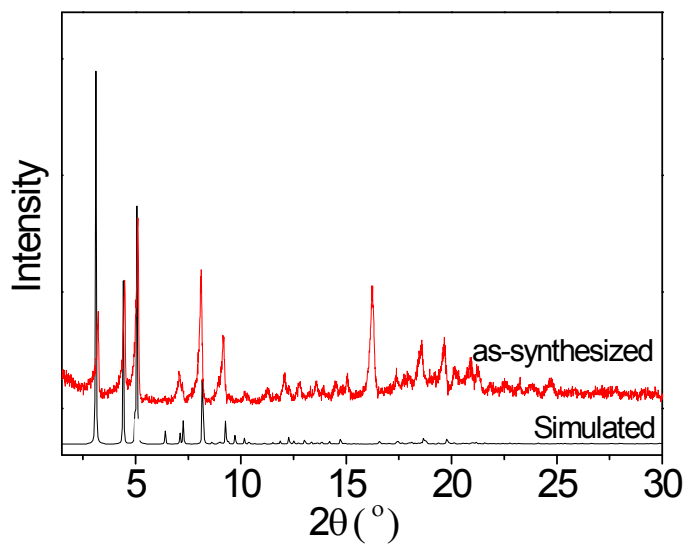

**Fig. S6.** PXRD data of **1**. The profile coincided with the simulated pattern. The discrepancy could be caused by preferred orientation and the lattice solvent molecules that are not considered in the simulated pattern.

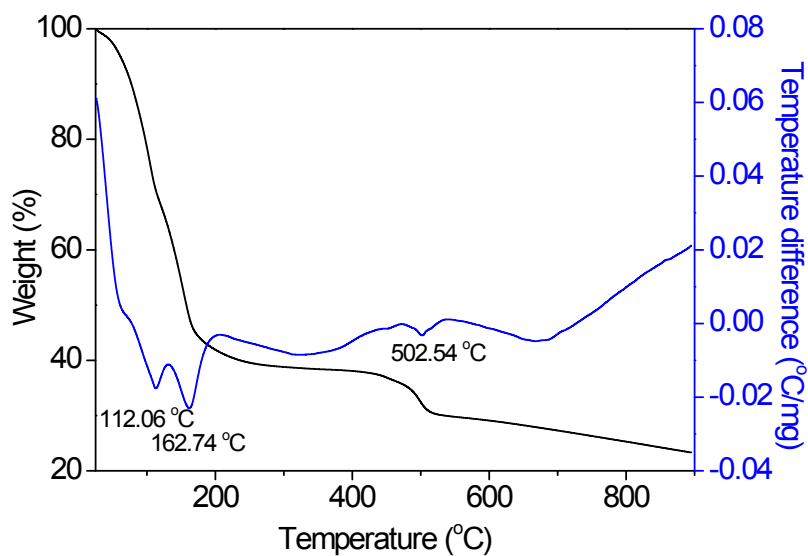

**Fig. S7.** TGA and DSC curves of **1**. TGA and DSC were conducted to determine the thermal stability of **1**. The initial mass decrease below 200 °C is due to the weight loss of solvent molecules (H<sub>2</sub>O and DEF) from the framework. A weight loss observed at about 500 °C is ascribed to the framework decomposition of **1**.

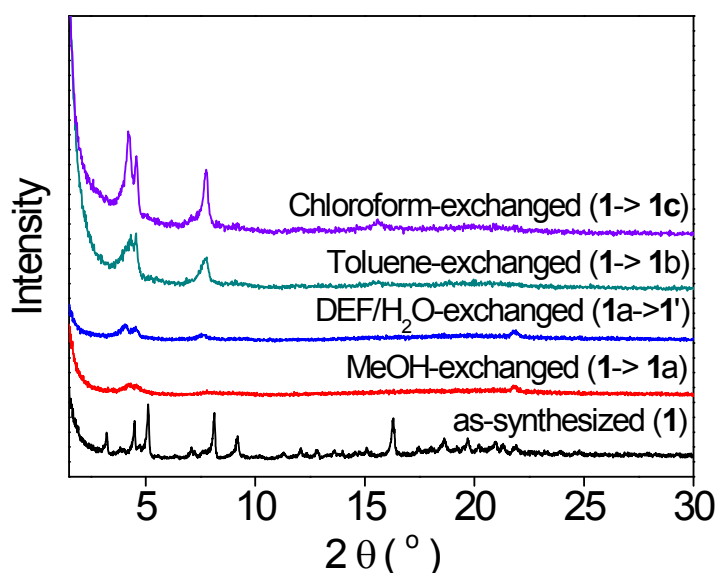

**Fig. S8.** PXRD data of as-synthesized (**1**), MeOH-exchanged (**1a**), and DEF/H<sub>2</sub>O-exchanged (**1'**), Toluene-exchanged (**1b**), Chloroform-exchanged (**1c**) after the solvent exchange process.



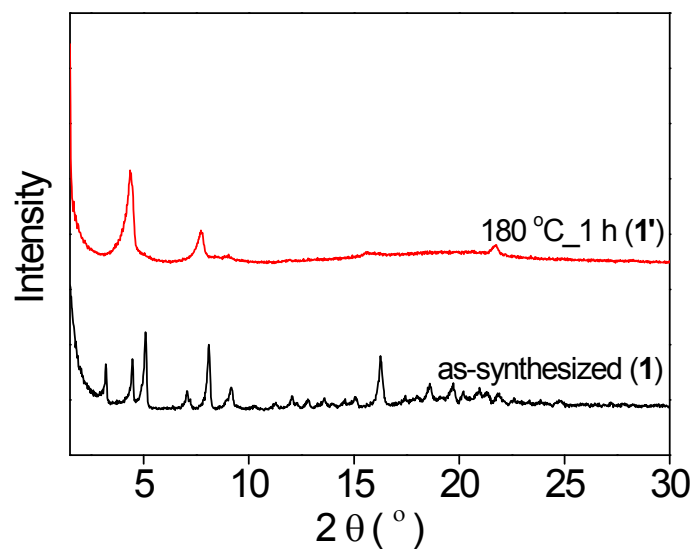

**Fig. S9.** PXRD data of as-synthesized **1** and **1'** treated in vacuum at 180 °C for 1 h.

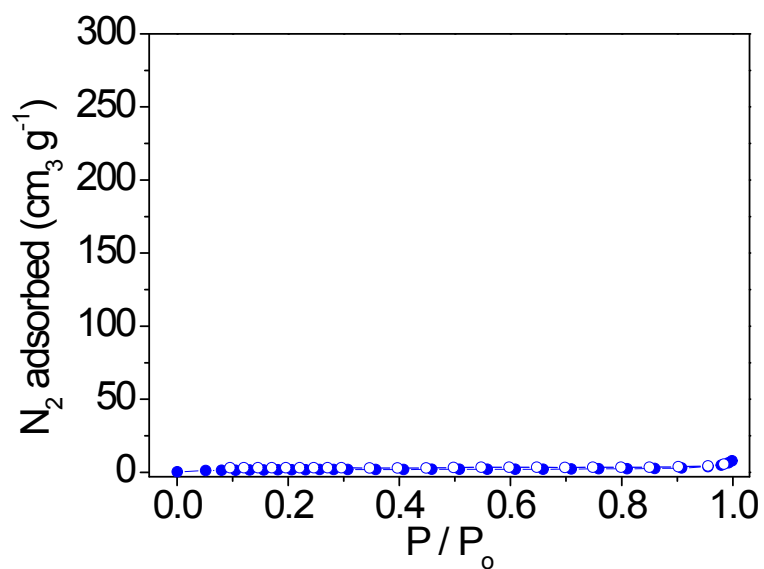

**Fig. S10.**  $N_2$  isotherm of the activated **1** at 77 K, implying that direct activation of the sample results in structural collapse.

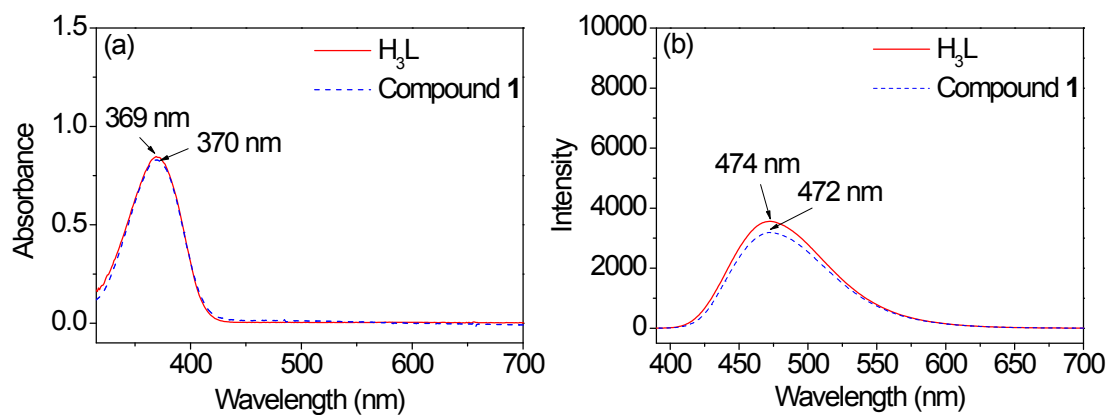

**Fig. S11.** (a) UV-vis data of H<sub>3</sub>L (line) and **1** (dashed line) in DEF. (b) PL data of H<sub>3</sub>L (line) and **1** (dashed line) upon excitation at 369 nm.

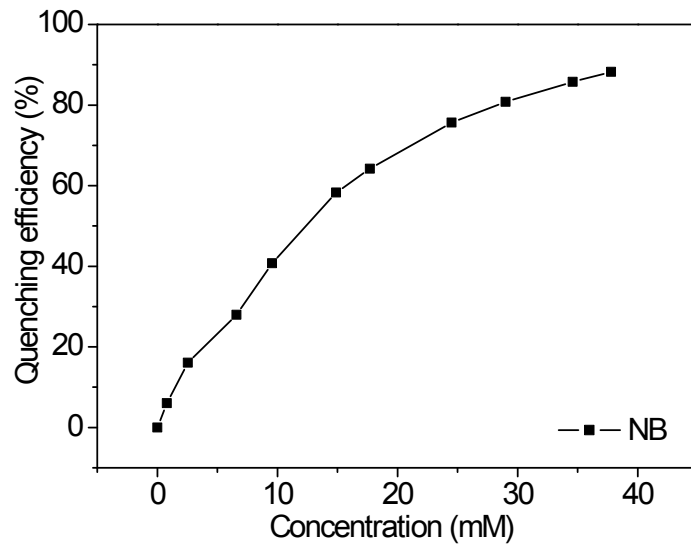

**Fig. S12.** Quenching efficiency of **1** as a function of the concentration of NB.

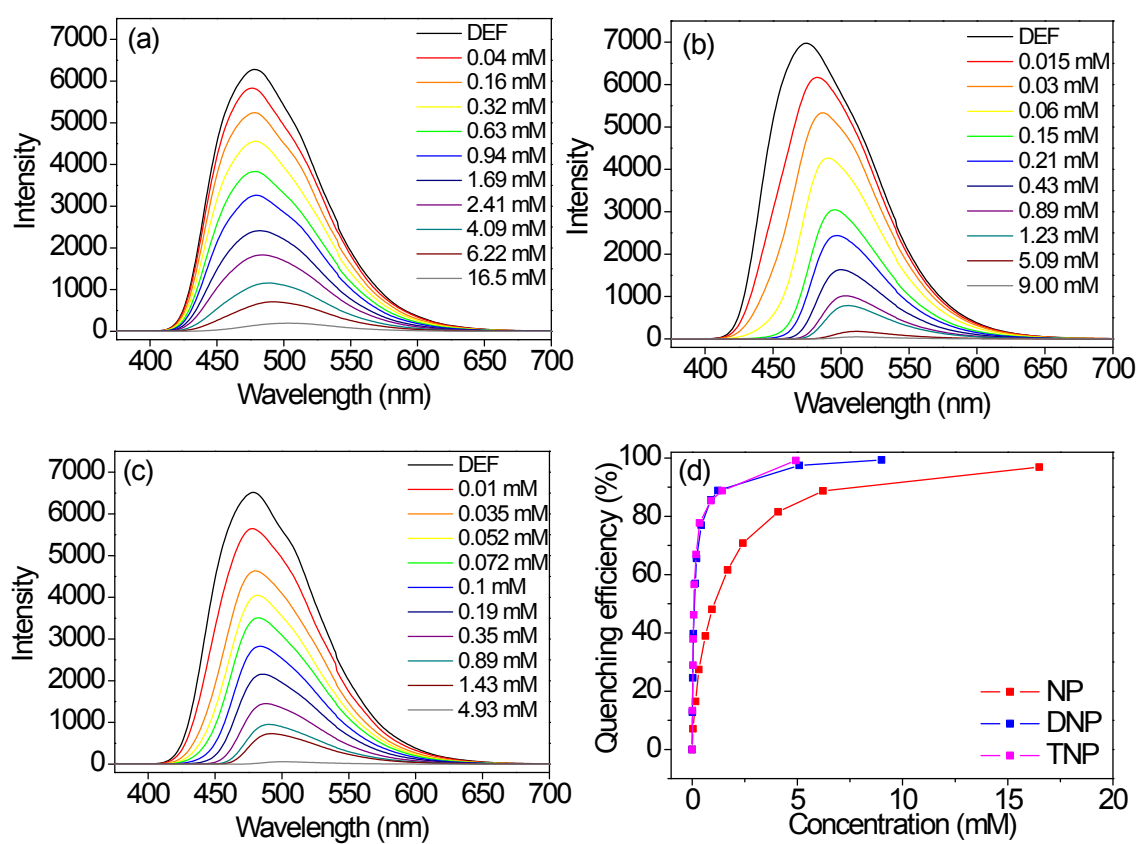

**Fig. S13.** Photoluminescence data of **1** after addition of (a) NP, (b) DNP, and (c) TNP with different concentrations. (d) Quenching efficiency of **1** for NP, DNP, and TNP.

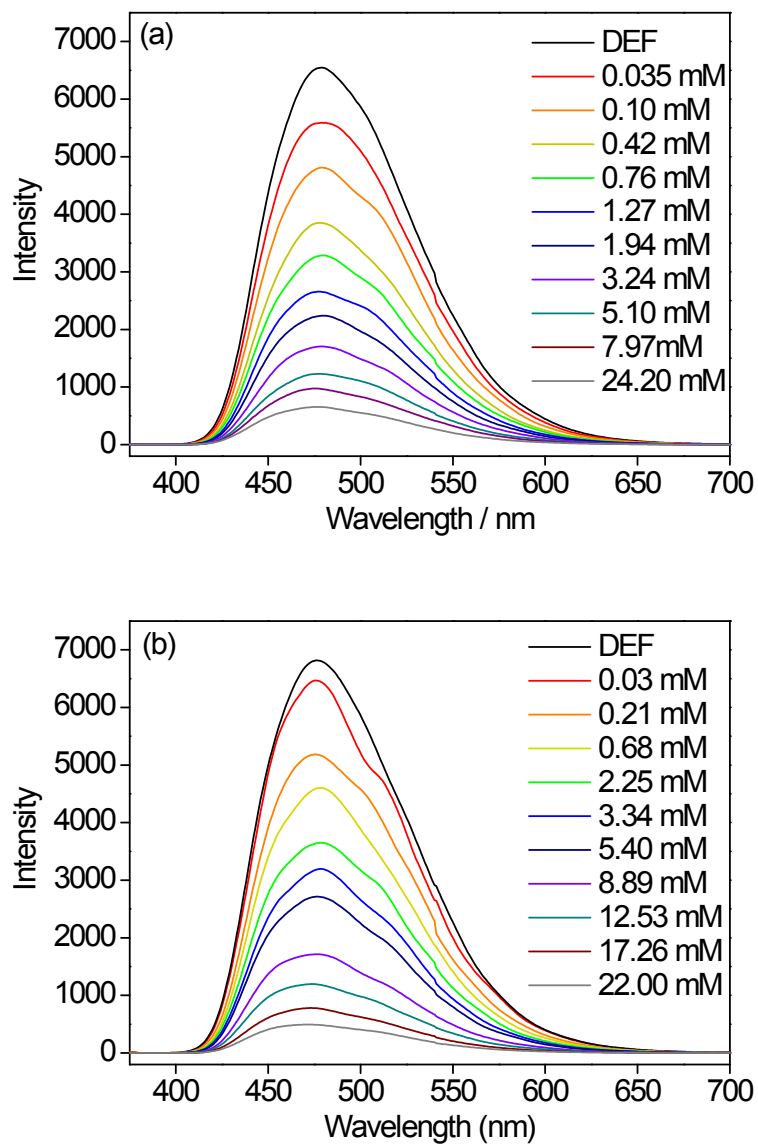

**Fig. S14.** Photoluminescence data of **1** after the addition of (a) NT and (b) DNT.

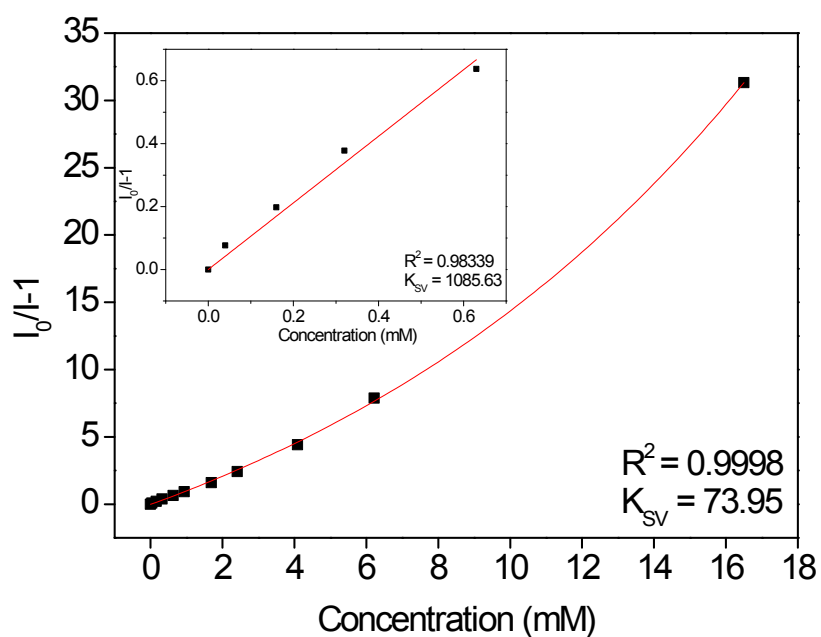

**Fig. S15.** The nonlinear Stern-Volmer plot of **1** at 25 °C as a function of the concentration of NP in DEF. The solid curve is the fitted results by an exponential quenching formula,  $I_0/I = A\exp(k[M]) + B$ . A, B, and k were determined to be 13.12, -12.14, and 0.074 in the concentration region. The inset shows the Stern-Volmer plot in the low concentration range. The solid line in the inset is the fitted result by the Stern-Volmer equation,  $I_0/I = (1.09 \times 10^3)[M] + 1$ .

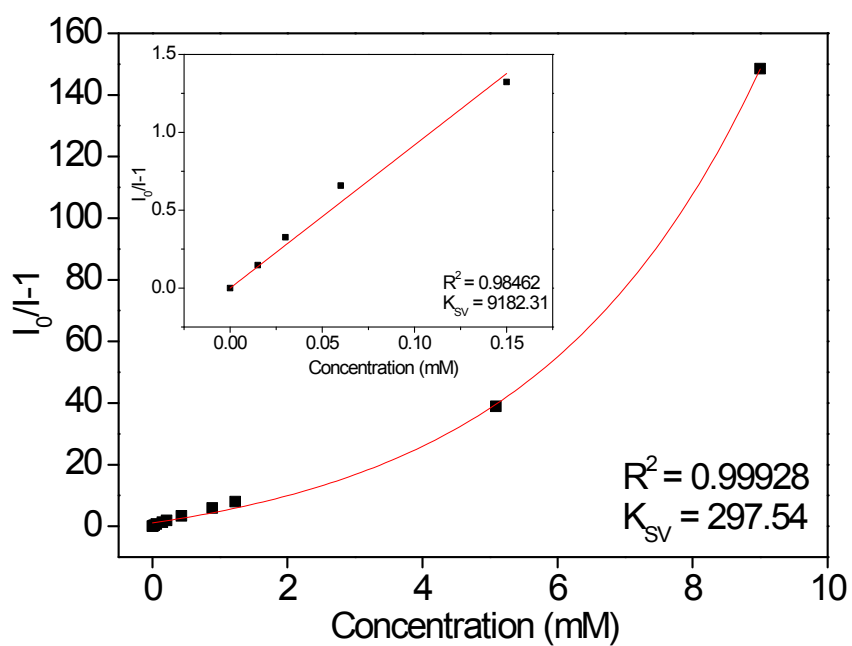

**Fig. S16.** The nonlinear Stern-Volmer plot of **1** at 25 °C as a function of the concentration of DNP in DEF. The solid curve is the fitted results by an exponential quenching formula,  $I_0/I = A\exp(k[M]) + B$ . A, B, and k were determined to be 10.87, -8.78, and 0.30 in the concentration region. The inset shows the Stern-Volmer plot in the low concentration range. The solid line in the inset is the fitted result by the Stern-Volmer equation,  $I_0/I = (9.18 \times 10^3)[M] + 1$ .

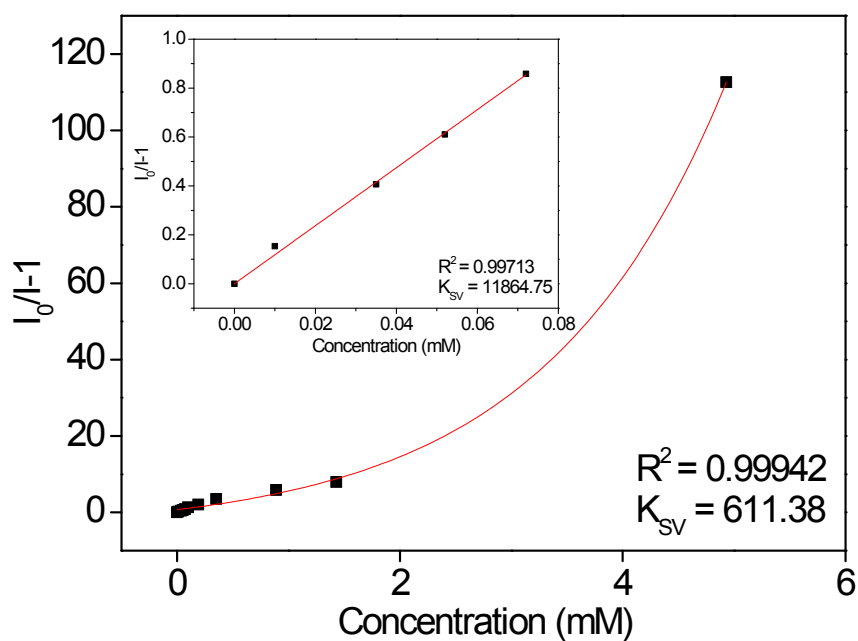

**Fig. S17.** The nonlinear Stern-Volmer plot of **1** at 25 °C as a function of the concentration of TNP in DEF. The solid curve is the fitted results by an exponential quenching formula,  $I_0/I = A\exp(k[M]) + B$ . A, B, and k were determined to be 5.78, -4.05, and 0.61 in the concentration region. The inset shows the Stern-Volmer plot in the low concentration range. The solid line in the inset is the fitted result by the Stern-Volmer equation,  $I_0/I = (1.19 \times 10^4)[M] + 1$ .

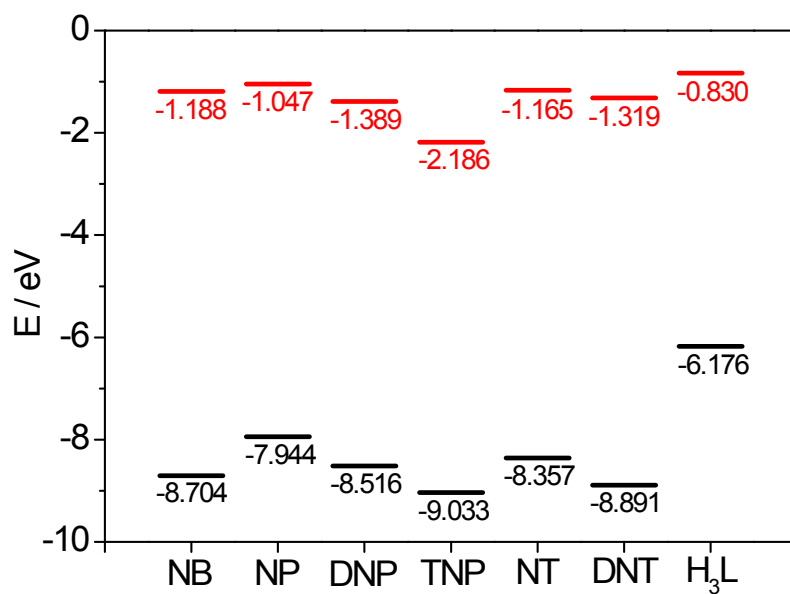

**Fig. S18.** Relative energies of ligands and NACs, as calculated by using M06-2X/6-31G\*\* level with the SMD solvation model.

**Table S1.** The frontier molecular orbital energies for ligands and NACs as calculated at M06-2X/6-31G\*\* level of theory.

|                  | HOMO / eV | LUMO / eV | Energy Gap / eV |
|------------------|-----------|-----------|-----------------|
| NB               | -8.704    | -1.188    | 7.516           |
| NP               | -7.944    | -1.047    | 6.897           |
| DNP              | -8.516    | -1.389    | 7.127           |
| TNP              | -9.033    | -2.186    | 6.847           |
| NT               | -8.357    | -1.165    | 7.192           |
| DNT              | -8.891    | -1.319    | 7.572           |
| H <sub>3</sub> L | -6.176    | -0.830    | 5.346           |



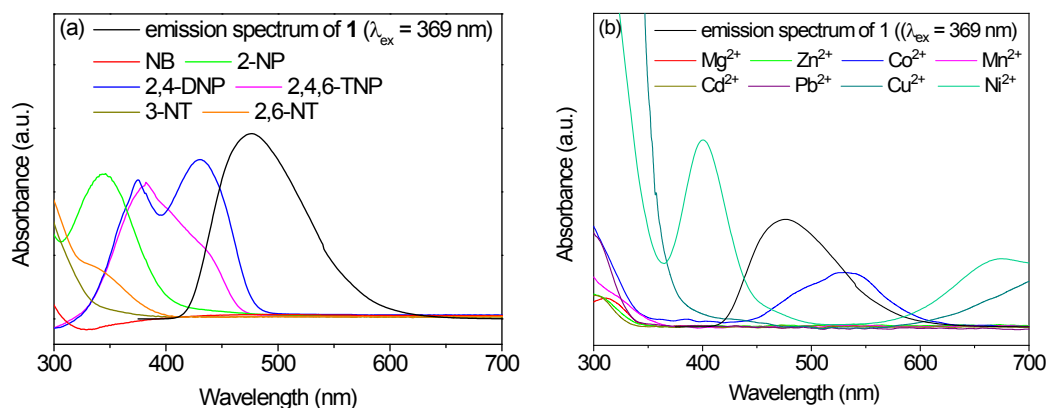

**Fig. S19.** UV-Vis absorption spectra of (a) nitroaromatic molecules, (b) metal ions in DEF and the emission spectrum of **1**.

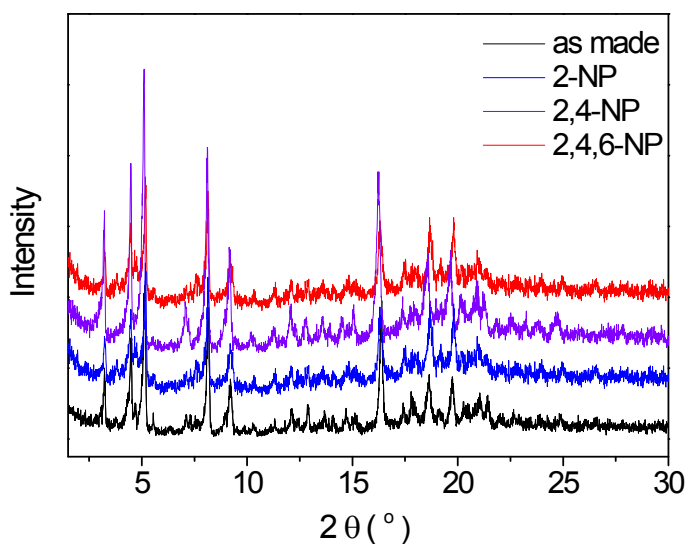

**Fig. S20.** PXRD profiles of **1** after quenching studies for NB, NP, DNP, and TNP. After the PL experiments, the dispersed solutions of complex **1**-nitroaromatic compounds were centrifuged and washed with fresh DEF. The centrifugation and washing step were repeated five times and then immersed in fresh DEF with stirring for 1 h. After that, the supernatant was decanted. The solid product **1** was dried under  $\text{N}_2$  atmosphere and then PXRD was collected.

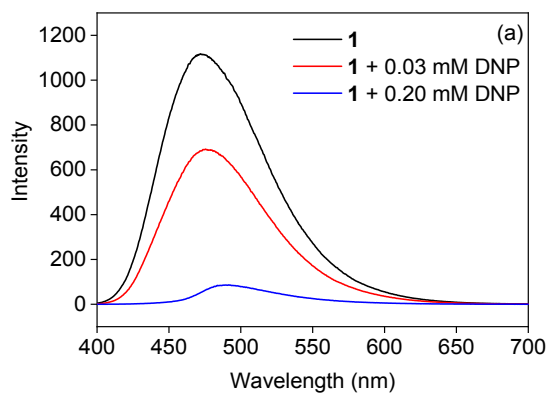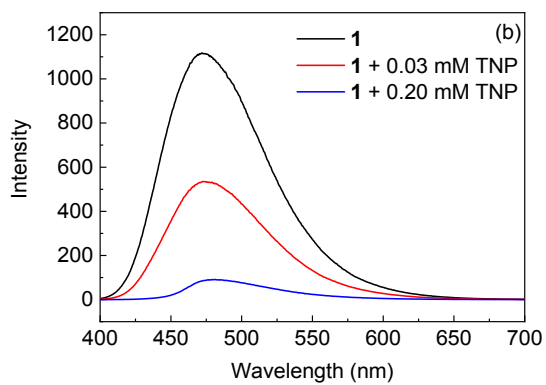

**Fig. S21.** Emission spectra of **1** upon increasing addition of various concentration of (a) DNP and (b) TNP.

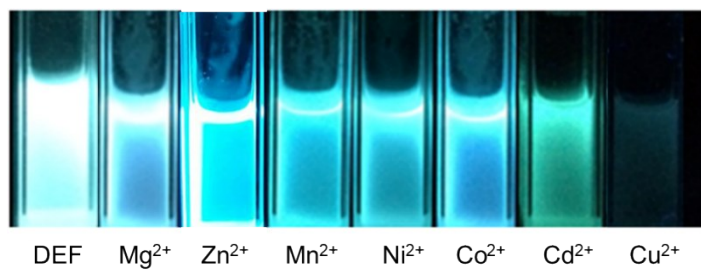

(a)

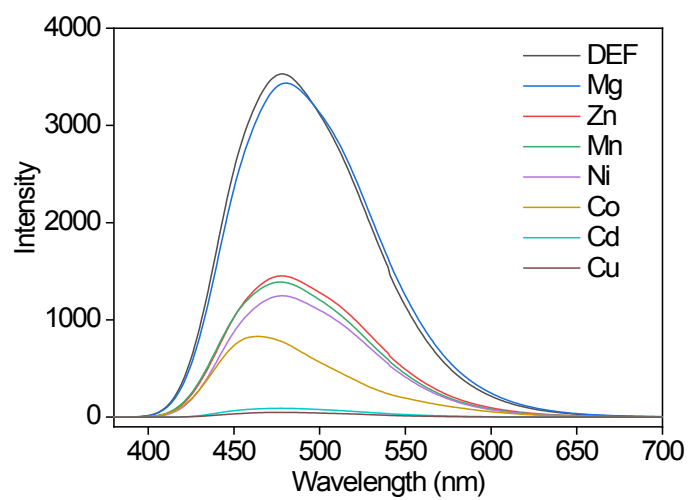

(b)

**Fig. S22.** (a) Photographs of **1** dispersed in DEF with the indicated metal ions after UV irradiation. (b) Photoluminescence data of **1** after addition of metal ions in DEF.

**Table S2.** Calculated values of quenching effect coefficients ( $K_{SV}$ ).

| Metal ions | $K_{sv}$ [ $M^{-1}$ ] |
|------------|-----------------------|
| $Mn^{2+}$  | 26.53                 |
| $Mg^{2+}$  | 3.91                  |
| $Ni^{2+}$  | 80.83                 |
| $Co^{2+}$  | 85.4                  |
| $Cd^{2+}$  | 1489.36               |
| $Cu^{2+}$  | 1608.67               |

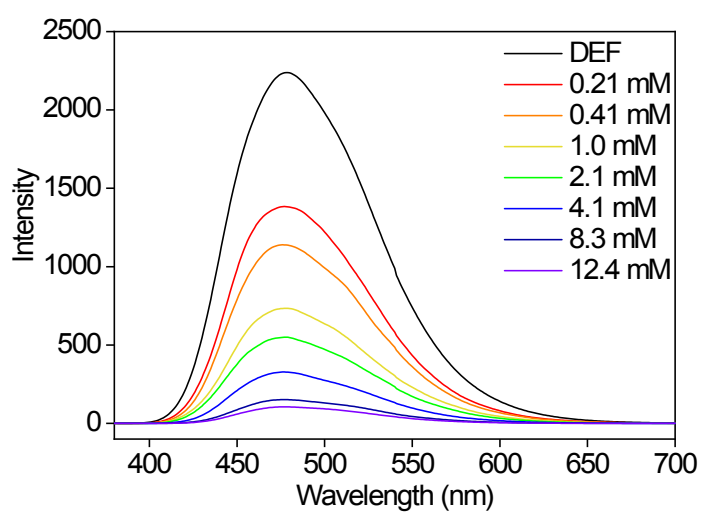

**Fig. S23.** Photoluminescence data of **1** after addition of  $Cu^{2+}$  solution with different concentrations.

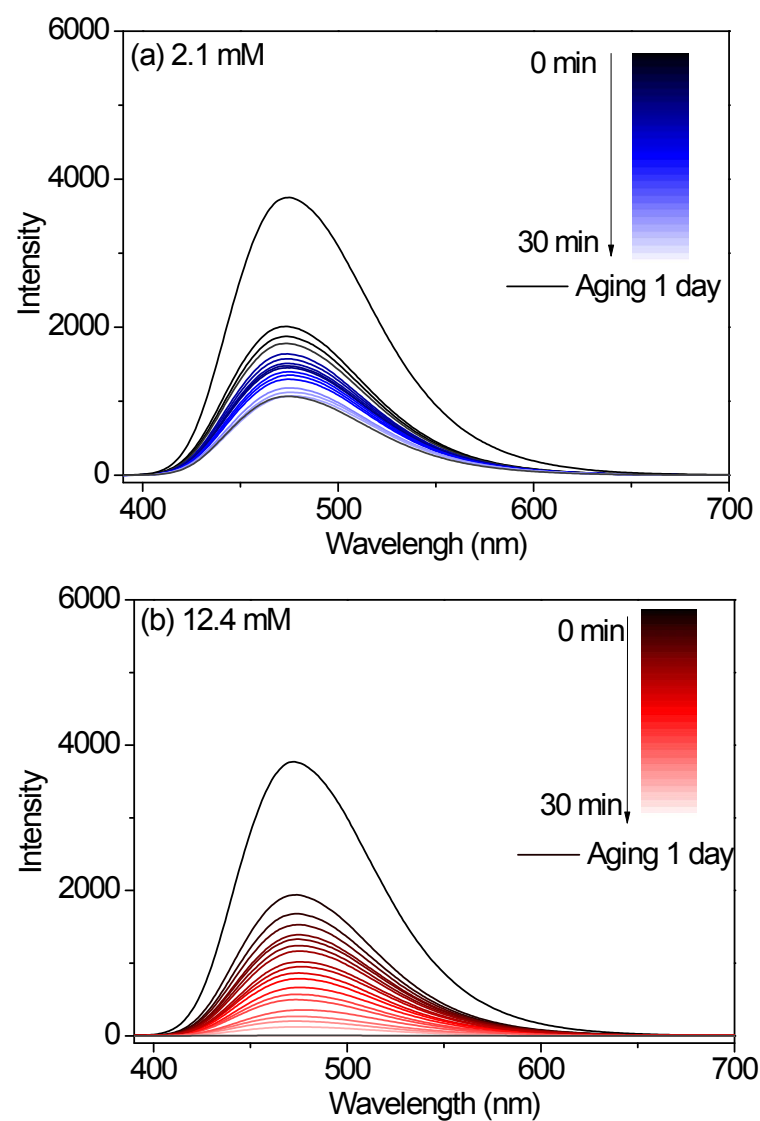

**Fig. S24.** Time-dependence fluorescence intensity variation in (a) 2.1 mM and (b) 12.4 mM  $\text{Cu}^{2+}$  solutions.

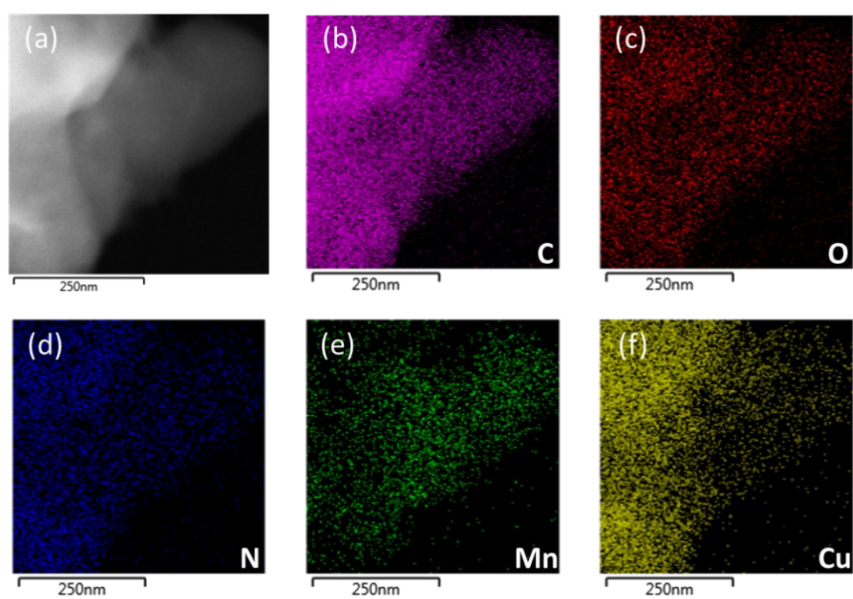

**Fig. S25.** (a) TEM-EDS image of  $\text{Cu}^{2+}$ -incorporated **1**, TEM-EDS elemental mapping images of (b) C, (c) O, (d) N, (e) Mn, and (f) Cu in  $\text{Cu}^{2+}$ -incorporated **1**, indicating that diffusion of  $\text{Cu}^{2+}$  ions into the pores of the framework.

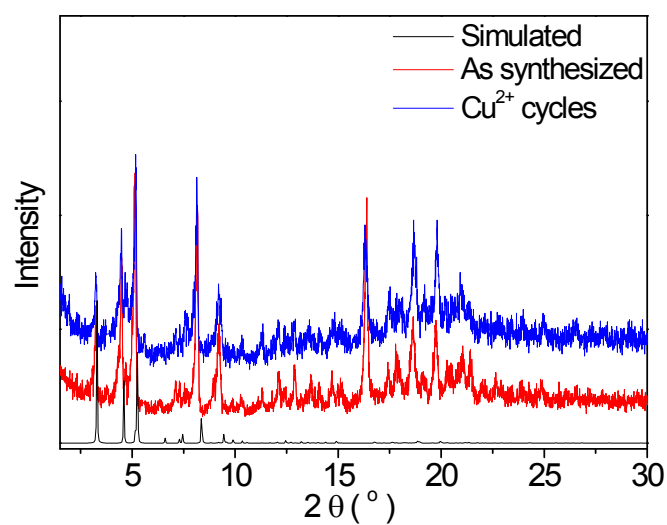

**Fig. S26.** PXRD data of **1** (red) before and (blue) after 5 cycles. The black line stands for the simulated pattern.

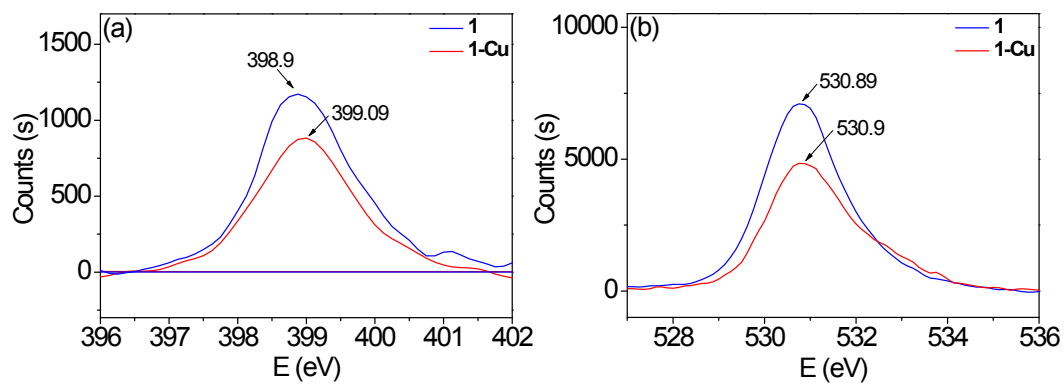

**Fig. S27.** (a) N1s and (b) O1s peaks in the XPS spectra of **1** and **1-Cu**.

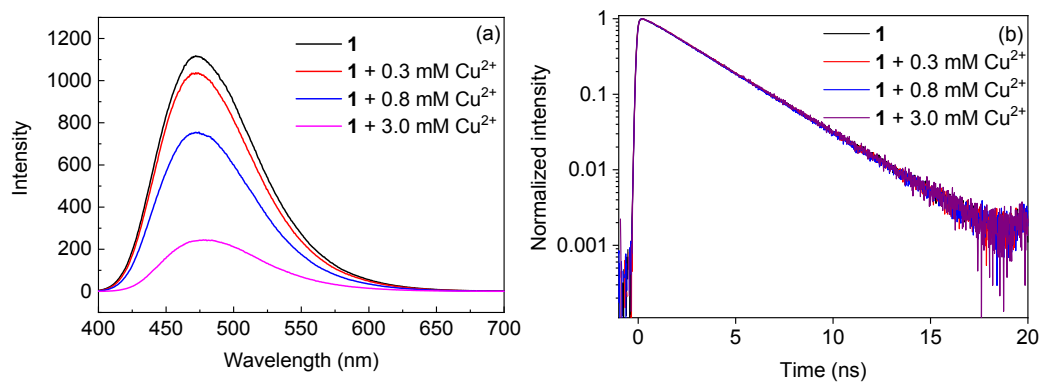

**Fig. S28.** (a) Emission spectra and (b) TRF signals of **1** upon increasing addition of various concentration of Cu<sup>2+</sup> solution. Excitation wavelength is 375 nm.



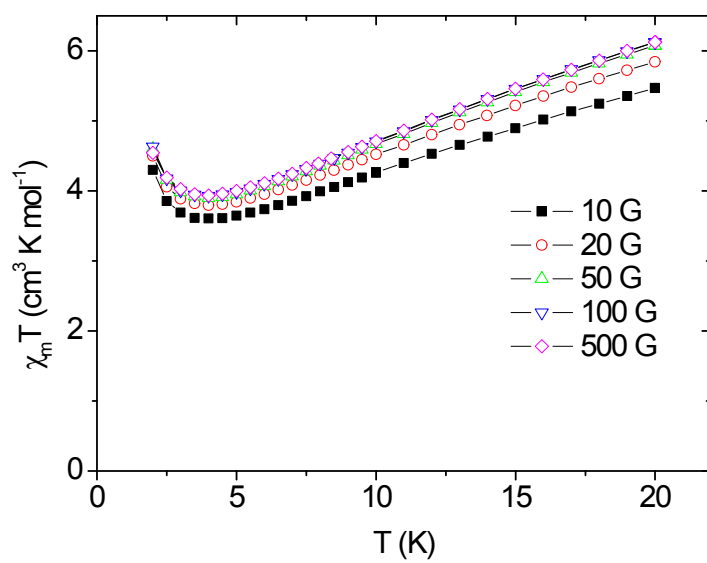

**Fig. S29.** Plots of  $\chi_m T$  versus  $T$  for **1** at several magnetic fields.

The molar susceptibility can be derived from the general form of the Van Vleck equation. The general expression of magnetic susceptibility for the Mn<sub>3</sub> trimer ( $S_{Mn} = 5/2$ ) is given as below.

$$p = J/kT$$

$$A =$$

$$\begin{aligned} &52.5+15\exp(2.5p)+126\exp(3.5p)+52.5\exp(5p)+1.5\exp(5p)+15\exp(6.5p)+1.5\exp(8p)+24 \\ &7.5\exp(8p) \\ &+126\exp(8.5p)+52.5\exp(9p)+15\exp(9.5p)+15\exp(11.5p)+52.5\exp(12p)+126\exp(12.5p) \\ &+247.5\exp(13p) \\ &+429\exp(13.5p)+52.5\exp(14p)+52.5\exp(15p)+126\exp(15.5p)+247.5\exp(17p)+126\exp( \\ &17.5p) \\ &+429\exp(18.5p)+247.5\exp(20p)+682.5\exp(20p)+429\exp(22.5p)+682.5\exp(25p)+1020e \\ &xp(27.5p) \end{aligned}$$

$$B =$$

$$\begin{aligned} &6+4\exp(2.5p)+8\exp(3.5p)+6\exp(5p)+2\exp(5p)+4\exp(6.5p)+2\exp(8p)+10\exp(8p)+8\exp( \\ &8.5p) \\ &+6\exp(9p)+4\exp(9.5p)+4\exp(11.5p)+6\exp(12p)+8\exp(12.5p)+10\exp(13p)+12\exp(13.5p)+ \\ &6\exp(14p) \\ &+6\exp(15p)+8\exp(15.5p)+10\exp(17p)+8\exp(17.5p)+12\exp(18.5p)+10\exp(20p)+14\exp( \\ &20p) \\ &+12\exp(22.5p)+14\exp(25p)+16\exp(27.5p) \end{aligned}$$

$$\chi_m(\text{trimer}) = (Ng^2\beta^2/3kT)(A/B)$$

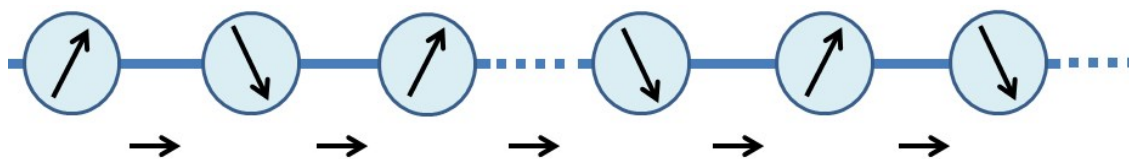

**Fig. S30.** Spin canting phenomenon in the antiferromagnetically coupled chain. Weak ferromagnetism occurs as a result of the canted spin system.

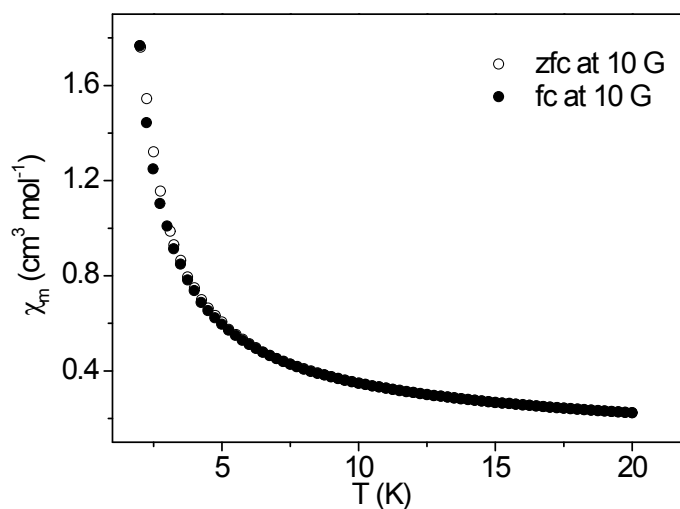

**Fig. S31.** Plots of zero-field cooled (zfc) and field-cooled (fc) magnetization curves for **1** at 10 G.

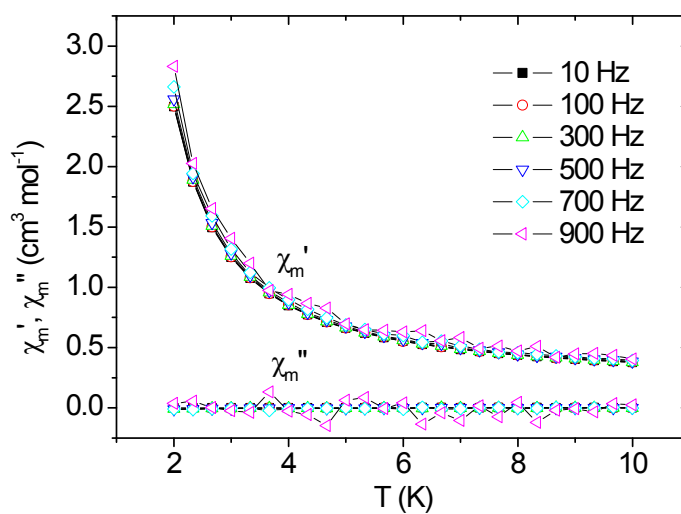

**Fig. S32.** Plots of  $\chi_m'$  and  $\chi_m''$  versus  $T$  for **1** at the indicated frequencies.
